# Supplementary material for: Facile preparation of α-amino ketones from oxidative ring-opening of aziridines by pyridine N-oxide
Source: Royal Society of Chemistry journal article supplement (doi:10.1039/b711638a), 2007-01-01
Supplement: b711638a.pdf [file b711638a.pdf]

## Facile Preparation of $\alpha$ -Amino ketones from Oxidative Ring-Opening of Aziridines by Pyridine *N*-Oxide

Zhi-Bin Luo, Jing-Yu Wu, Xue-Long Hou\* and Li-Xin Dai

State Key Laboratory of Organometallic Chemistry, Shanghai Institute of Organic Chemistry,

Chinese Academy of Sciences, 354 Fenglin Road, Shanghai 200032, P. R. China

E-mail: [xlhou@mail.sioc.ac.cn](mailto:xlhou@mail.sioc.ac.cn)

**General Experimental Conditions.** All reactions were performed in dry tube under an argon atmosphere if not noted. Toluene was redistilled with Na. Aziridines were prepared according to literature.<sup>1</sup> All of the other commercially available reagents were used as received without further purification. Melting points were not corrected. <sup>1</sup>H NMR and <sup>13</sup>C NMR spectra were recorded on Varian 300 MHz and 90 MHz spectrometers, the chemical shifts were referenced to tetramethylsilane in CDCl<sub>3</sub>. IR spectra were measured in cm<sup>-1</sup>.

**General procedure for the oxidative ring opening reaction of aziridines with pyridine *N*-oxide:** To an oven-dried tube charged with aziridine **1** (0.5 mmol), pyridine *N*-oxide (57 mg, 0.6 mmol) and toluene (2 mL) under Ar, the resulting mixture was warmed to 80 °C and stirred at this temperature until the starting material **1** disappeared (monitored by TLC). The solvent was removed under reduced pressure and the residue was purified by chromatography (silica gel: petroleum ether/AcOEt = 3:1) to afford  $\alpha$ -amino carbonyl compounds **3**.

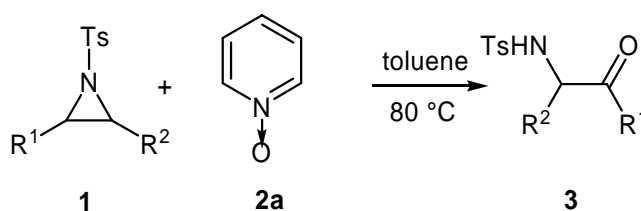

**4-methyl-N-(2-oxo-cyclopentyl)-benzenesulfonamide (3a):**<sup>2</sup> 77% yield; white solid; m.p. 122-123°C; <sup>1</sup>H NMR (300 MHz, CDCl<sub>3</sub>/TMS) (ppm): δ = 1.62-1.78 (m, 2H), 2.02-2.18 (m, 2H), 2.31-2.37 (m, 1H), 2.40 (s, 3H), 2.50-2.56 (m, 1H), 3.40-3.48 (m, 1H), 5.11 (s, 1H), 7.31 (d, *J* = 8.1 Hz, 2H), 7.76 (d, *J* = 8.4 Hz, 2H). <sup>13</sup>C NMR (CDCl<sub>3</sub>/TMS) (ppm): δ = 17.6 (CH<sub>2</sub>), 21.5 (Ar-CH<sub>3</sub>), 30.8 (CH<sub>2</sub>), 34.2 (CH<sub>2</sub>), 60.2 (N-CH), 127.1 (Ar-C), 129.7 (Ar-C), 136.1 (Ar-C), 143.8 (Ar-C), 213.2 (C=O). EI-MS *m/z* (intensity): 253 (1.20) [M<sup>+</sup>], 91 (100) [*p*-Me-Ph<sup>+</sup>]. IR (cm<sup>-1</sup>): 1739 (s, C=O), 3272 (s, NH).

**4-methyl-N-(2-oxo-cyclohexyl)-benzenesulfonamide (3b):**<sup>2</sup> 76% yield; white solid; m.p. 116-118°C; <sup>1</sup>H NMR (300 MHz, CDCl<sub>3</sub>/TMS) (ppm): δ = 1.50-1.66 (m, 3H), 1.82-1.85 (m, 1H), 2.03-2.09 (m, 1H), 2.21-2.25 (m, 1H), 2.40 (s, 3H), 2.44-2.55 (m, 2H), 3.74 (m, 1H), 5.78 (d, *J* = 4.5 Hz, 1H), 7.27 (d, *J* = 8.7 Hz, 2H), 7.71 (d, *J* = 7.8 Hz, 2H). <sup>13</sup>C NMR (CDCl<sub>3</sub>/TMS) (ppm): δ = 21.4 (Ar-CH<sub>3</sub>), 23.8 (CH<sub>2</sub>), 27.3 (CH<sub>2</sub>), 36.7 (CH<sub>2</sub>), 40.7 (CH<sub>2</sub>), 60.5 (N-CH), 126.9 (Ar-C), 129.6 (Ar-C), 136.8 (Ar-C), 143.5 (Ar-C), 205.7 (C=O) EI-MS *m/z* (intensity): 267 (10) [M<sup>+</sup>], 91 (100) [*p*-Me-Ph<sup>+</sup>]. IR (cm<sup>-1</sup>): 1708 (s, C=O), 3276 (s, NH).

**N-(2-oxo-cyclohexyl)-benzamide (3d):**<sup>3</sup> 80% yield; white solid; m.p. 127-128°C; <sup>1</sup>H NMR (300 MHz, CDCl<sub>3</sub>/TMS) (ppm): δ = 1.44 (m, 1H), 1.62-1.95 (m, 3H), 2.21 (m, 1H), 2.41-2.62 (m, 2H), 2.82 (m, 1H), 4.67 (m, 1H), 7.22 (d, *J* = 4.5 Hz, 1H), 7.45 (m, 3H), 7.83 (m, 2H). <sup>13</sup>C NMR (CDCl<sub>3</sub>/TMS) (ppm): δ = 23.9 (CH<sub>2</sub>), 28.0 (CH<sub>2</sub>), 35.5 (CH<sub>2</sub>), 41.1 (CH<sub>2</sub>), 58.4 (N-CH), 127.0 (Ar-C), 128.5 (Ar-C), 131.6 (Ar-C), 134.0 (Ar-C), 166.7 (N-C=O), 207.9 (C=O). EI-MS *m/z* (intensity): 217 (47.89) [M<sup>+</sup>], 105 (100) [PhCO<sup>+</sup>], 77 (49.75) [Ph<sup>+</sup>]. IR (cm<sup>-1</sup>): 1714 (s, C=O), 1631 (s, C=O), 3259 (s, NH)

**N-phenacyl-toluene-4-sulfonamide (3e):**<sup>2</sup> 40% yield; white solid; m.p. 110-111°C; <sup>1</sup>H NMR (300 MHz, CDCl<sub>3</sub>/TMS) (ppm): δ = 2.39 (s, 3H), 4.46 (d, *J* = 4.5 Hz, 2H), 5.65 (s, 1H), 7.27 (d, *J* = 7.8 Hz, 2H), 7.47 (t, *J* = 7.8 Hz, 2H), 7.61 (t, *J* = 7.2 Hz, 1H), 7.78 (d, *J* = 7.8 Hz, 2H), 7.85 (d, *J* = 8.1 Hz, 2H). <sup>13</sup>C NMR (CDCl<sub>3</sub>/TMS) (ppm): δ = 21.5 (Ar-CH<sub>3</sub>), 48.6 (N-CH<sub>2</sub>), 127.1 (Ar-C), 127.9 (Ar-C), 128.9 (Ar-C), 129.8 (Ar-C), 133.6 (Ar-C), 134.4 (Ar-C), 135.9 (Ar-C), 143.7 (Ar-C), 192.4 (C=O). EI-MS *m/z* (intensity): 289 (0.31) [M<sup>+</sup>], 105 (100)

[PhCO<sup>+</sup>]. IR (cm<sup>-1</sup>): 1687 (s, C=O), 3280 (m, NH).

***N*-(1-oxo-indan-2-yl)-4-methyl-benzenesulfonamide (3f)**: 55% yield; white solid; m.p. 129-130°C; <sup>1</sup>H NMR (300 MHz, CDCl<sub>3</sub>/TMS) (ppm): δ = 2.44 (s, 3H), 3.17 (dd, *J* = 5.4, 5.4 Hz, 1H), 3.65 (dd, *J* = 7.8, 8.1 Hz, 1H), 3.88 (m, 1H), 5.31 (s, 1H), 7.33-7.47 (m, 4H), 7.62-7.74 (m, 2H), 7.84 (dd, *J* = 1.8, 2.1 Hz, 2H). <sup>13</sup>C NMR (CDCl<sub>3</sub>/TMS) (ppm): δ = 21.5 (Ar-CH<sub>3</sub>), 36.4 (CH<sub>2</sub>), 58.4 (N-CH), 124.3 (Ar-C), 126.7 (Ar-C), 127.4 (Ar-C), 128.0 (Ar-C), 129.8 (Ar-C), 133.6 (Ar-C), 135.6 (Ar-C), 136.1 (Ar-C), 143.9 (Ar-C), 151.4 (Ar-C), 201.2 (C=O). EI-MS *m/z* (intensity): 299 (3.91). IR (cm<sup>-1</sup>): 1722 (s, C=O), 3254 (s, NH). Anal. Calcd for C<sub>16</sub>H<sub>15</sub>NO<sub>3</sub>S: C 63.77, H 5.05, N 4.65. Found: C 63.69, H 4.96, N 4.50.

**4-methyl-*N*-(2-oxo-1-pentyl-2-methyl-ethyl)-benzenesulfonamide (3g) and 4-methyl-*N*-(2-oxo-1-methyl-2-pentyl-ethyl)-benzenesulfonamide (3g')**: 74% Yield; white solid; <sup>1</sup>H NMR (300 MHz, CDCl<sub>3</sub>/TMS) (ppm): δ = 0.83 (t, *J* = 8.1 Hz, 3H), 1.08-1.42 (m, 8H), 1.64 (m, 0.74H, CH<sub>3</sub> of 3g'), 2.04 (s, 2.17H, CH<sub>3</sub> of 3g), 3.90 (m, 1H), 5.46 (d, *J* = 7.2 Hz, 0.59H, NH of 3g), 5.60 (d, *J* = 7.2 Hz, 0.26H, NH of 3g'), 7.28 (d, *J* = 7.8 Hz, 2H), 7.70 (d, *J* = 8.4 Hz, 2H). <sup>13</sup>C NMR (CDCl<sub>3</sub>/TMS) (ppm): δ = 13.73, 13.83 (CH<sub>3</sub>), 21.43, 21.45 (Ar-CH<sub>3</sub>), 19.05 (CH<sub>2</sub>), 22.23, 22.25 (CH<sub>2</sub>), 23.06 (CH<sub>2</sub>), 24.02 (CH<sub>2</sub>), 26.55 (CH<sub>2</sub>), 30.98, 31.20 (CH<sub>2</sub>), 38.81 (CH<sub>2</sub>), 56.94, 61.82 (CH<sub>2</sub>), 127.05 (Ar-C), 129.60, 129.63 (Ar-C), 136.69 (Ar-C), 143.52, 143.55 (Ar-C), 205.59 (C=O). Anal. Calcd for C<sub>15</sub>H<sub>23</sub>NO<sub>3</sub>S: C 60.58, H 7.79, N 4.71. Found: C 60.46, H 7.64, N 4.76.

***N*-(1-formyl-heptyl)-4-methyl-benzenesulfonamide (3h) and 4-methyl-*N*-(2-oxo-2-hexyl-ethyl)-benzenesulfonamide (3h')**: 20% Yield; Colorless oil; <sup>1</sup>H NMR (300 MHz, CDCl<sub>3</sub>/TMS) (ppm): δ = 0.86 (t, *J* = 7.2 Hz, 3H), 1.20-1.35 (m, 8H), 1.49 (m, 1.4H, CH<sub>2</sub>CH of 3h), 2.33 (t, *J* = 7.5 Hz, 0.79H, CH<sub>2</sub>CO of 3h'), 2.40 (s, 3H), 3.84 (m, 1H), 5.37 (d, *J* = 6.3 Hz, 0.61H), 7.29 (d, *J* = 6.9 Hz, 2H), 7.74 (d, *J* = 8.1 Hz, 2H), 9.43 (s, 0.30H). EI-MS *m/z* (intensity): 298 (0.61) [M+1], 91 (100) [*p*-Me-Ph<sup>+</sup>].

**2-[(4-methylphenyl)sulfonyl]amino-propiophenone (3i)<sup>4</sup> and *N*-(2-oxo-1-phenyl-**

**propyl)-4- methyl-benzenesulfonamide (3i')<sup>4</sup>**: 82% yield; white solid; <sup>1</sup>H NMR (300 MHz, CDCl<sub>3</sub>/TMS) (ppm): δ = 1.40 (d, *J* = 7.2 Hz, 2.46H, CH<sub>3</sub> of 3i), 1.99 (s, 0.57H, CH<sub>3</sub> of 3i'), 2.31, 2.34 (s, 3H), 4.91-5.05 (m, 1H), 5.83 (d, *J* = 8.1 Hz, 0.72H), 6.11 (d, *J* = 4.5 Hz, 0.20H), 7.08-7.78 (m, 9H). <sup>13</sup>C NMR (CDCl<sub>3</sub>/TMS) (ppm): δ = 21.0 (Ar-CH<sub>3</sub>), 21.3, 26.7 (CH<sub>3</sub>), 53.2, 66.3 (N-CH), 126.9 (Ar-C), 127.0 (Ar-C), 127.9 (Ar-C), 128.4 (Ar-C), 128.5 (Ar-C), 128.7 (Ar-C), 128.9 (Ar-C), 129.2 (Ar-C), 129.6 (Ar-C), 134.0 (Ar-C), 143.4 (Ar-C), 198.0, 202.0 (C=O). EI-MS *m/z* (intensity): 91 (100), 260 (8.83).

### References:

1. (a) Evans, D. A.; Faul, M. M.; Bilodeau, M. T. *J. Am. Chem. Soc.* **1994**, *116*, 2742. (b) Ando, T.; Kano, D.; Minakata, S.; Ryu, N.; Komatsu, M. *Tetrahedron* **1998**, *54*, 13485. (c) Hedley, S. J.; Moran, W. J.; Price, D. A.; Harrity, J. P. A. *J. Org. Chem.* **2003**, *68*, 4286. (d) Vedernikov, A. N.; Caulton, K. G. *Org. Lett.* **2003**, *5*, 2591. (e) Mordini, A.; Russo, F.; Valacchi, M.; Zani, L.; Degl'Innocenti, A.; Reginato, G.; *Tetrahedron* **2002**, *58*, 7153. (f) Cui, Y; He, C. *J. Am. Chem. Soc.* **2003**, *125*, 16202.
2. J.-L. Liang, X.-Q. Yu, and C.-M. Che, *Chem. Commun.* **2002**, 124.
3. H. E. Baumgarten and F. Bower, *J. Am. Chem. Soc.* **1954**, *76*, 4561.
4. A. Villar, C. H. Hoevelmann, M. Nieger, K. Muniz, *Chem. Commun.* **2005**, *26*, 3304.
